# Supplementary material
Source: PubMed Central journal article supplement (PMC6616254)
Supplement: ba028993-suppl1.pdf [file ba028993-suppl1.pdf]

## **SUPPLEMENTAL DATA**

### **Clinical and biological features of PTPN2 deleted adult and pediatric T-cell acute lymphoblastic leukemia**

#### **Contents:**

- Supplemental methods
- Supplemental Figure 1: General design of FRALLE 2000 T guidelines
- Supplemental Figure 2: Patients flow chart (molecular characterization)
- Supplemental Figure 3: Patients flow chart (available data)
- Supplemental Figure 4: PTPN2 deletions sorted by age
- Supplemental Table 1: Chemotherapy in the standard risk group T1
- Supplemental Table 2: Chemotherapy in the high risk group T2
- Supplemental Table 3: Clinicobiologic characteristics of adult patients with T-ALL (GRAALL protocol) according to PTPN2 status
- Supplemental Table 4: Clinical characteristics and outcome of the study cohort versus non-investigated patients (GRALL protocol)
- Supplemental Table 5: Clinicobiologic characteristics of pediatric patients with T-ALL (FRALLE protocol) according to PTPN2 status
- Supplemental Table 6: Clinical characteristics and outcome of the study cohort versus non-investigated patients (FRALLE protocol)
- Supplemental Table 7: Genetic profile of PTPN2 deleted adult T-ALL
- Supplemental Table 8: Significant co-occurring mutations
- Supplemental Table 9: Focus on IL7R/JAK/STAT pathway mutations in PTPN2 deleted patients

## **SUPPLEMENTARY METHODS**

### **Clinical trials**

Patients aged from 15 to 59 years old were enrolled in the GRAALL-2003 and GRAALL-2005 protocols. The study design is provided as a supplementary PDF file.

Patients, from 1 to 14 years old, with a diagnosis of T-ALL were treated according the FRALLE 2000 T guidelines (FRALLE study group, Supplemental Figure 1). Diagnosis of T-ALL was performed using cytomorphology, cytochemistry and flow cytometry.

Definitions: Good prednisone response (GPR) was defined as  $< 1000$  circulating blasts/ $\mu\text{L}$  on day 8, poor prednisone response (PPR) when  $\geq 1000$  circulating blasts/ $\mu\text{L}$  on day 8. Morphologic assessment of a bone marrow aspirate was done at day 21. A chemosensitivity was represented by  $\leq 5\%$  blasts, a chemoresistance by  $> 5\%$ . Complete remission (CR) was defined as: absence of physical signs of leukemia, bone marrow with active hematopoiesis and  $< 5\%$  leukemic blast cells (identified morphologically), and normal cerebrospinal fluid.

Patients were stratified into two groups.

Treatment stratification: Standard risk group (T1) was defined by the presence of all the following criteria: good prednisone response (GPR) at day 8, chemosensitivity (CHs) at day 21, MRD  $< 10^{-2}$  at day 35. High risk group (T2) was defined by the presence of one of the following criteria: poor prednisone response (PPR) at day 8, chemoresistance at day 21 or MRD  $\geq 10^{-2}$  at day 35. Patients treated according to T2 group were eligible for allogeneic stem cell transplantation (SCT) after late intensification n°1 when a matched sibling or unrelated donor was available.

### **Microarray-based comparative genomic hybridization (array CGH)**

Diagnostic DNA was hybridized on Affymetrix (Santa Clara, CA) Cytogenetics Whole-Genome 2.7M Array, according to the manufacturer's directions. Data were analyzed with the Chromosome Analysis Suite (ChAS) software (Affymetrix®).

### **Quantitative real-time reverse transcription-polymerase chain reaction (qRT-PCR)**

One  $\mu\text{g}$  of total RNA was converted to cDNA in a random primed synthesis with the SUPERScript III reverse transcriptase (Life Technologies). PTPN2 expression was analyzed with a specific Mix 20X (reference Hs00959888\_g1, Thermo Fisher Scientific) following the manufacturer's instructions. PTPN2 expression was normalized on GAPDH expression (reference Hs02786624\_g1, Thermo Fisher Scientific). An ABI PRISM 7900 Sequence Detection System (Life Technologies) was used to perform the PCR reactions and measure fluorescence at each cycle. Generated data were analyzed using  $2^{-\Delta\Delta C_t}$  method.<sup>1</sup>

# SUPPLEMENTAL FIGURES

## Supplemental Figure 1

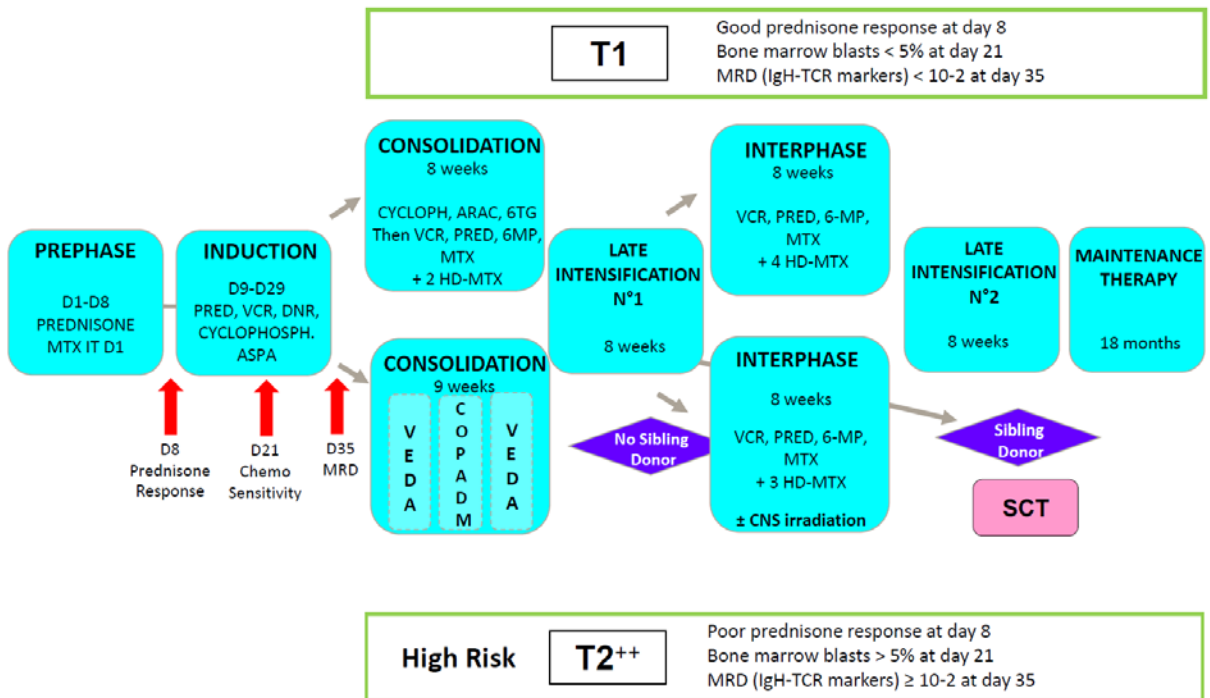

\*\* Patients treated according T2 group were eligible for SCT after late intensification n°1 when a sibling donor was available

**Supplemental Figure 1.** General design of FRALLE 2000 T guidelines.

**Supplemental Figure 2**

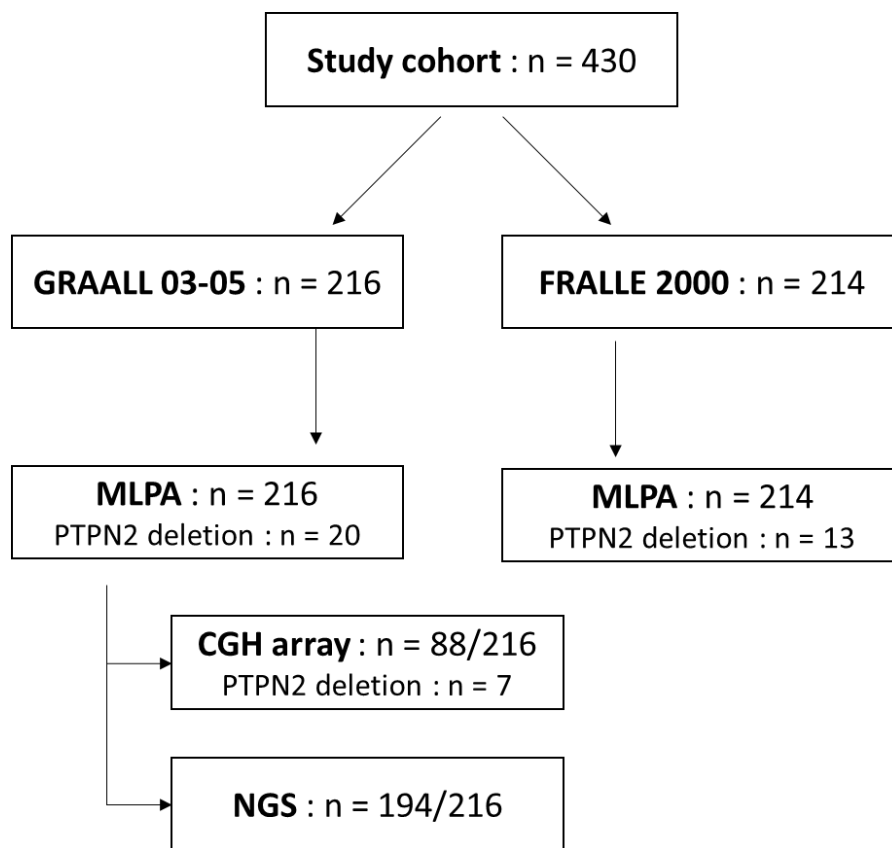

**Supplemental Figure 2.** Flow chart displaying the molecular characterization

**Supplemental Figure 3**

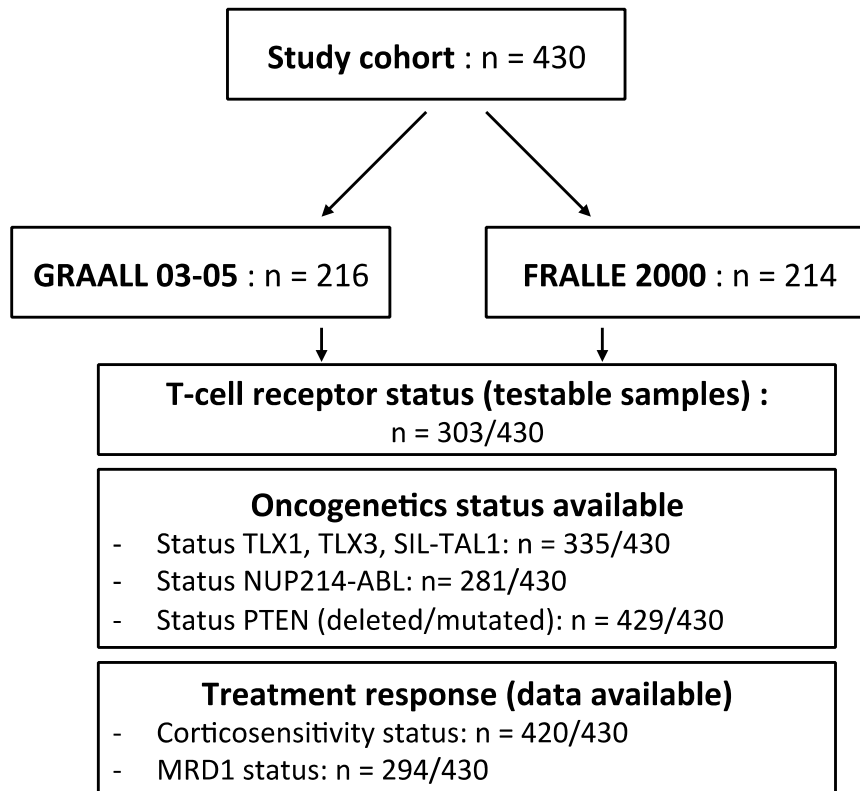

**Supplemental Figure 3.** Flow chart displaying the molecular data available

Supplemental Figure 4.

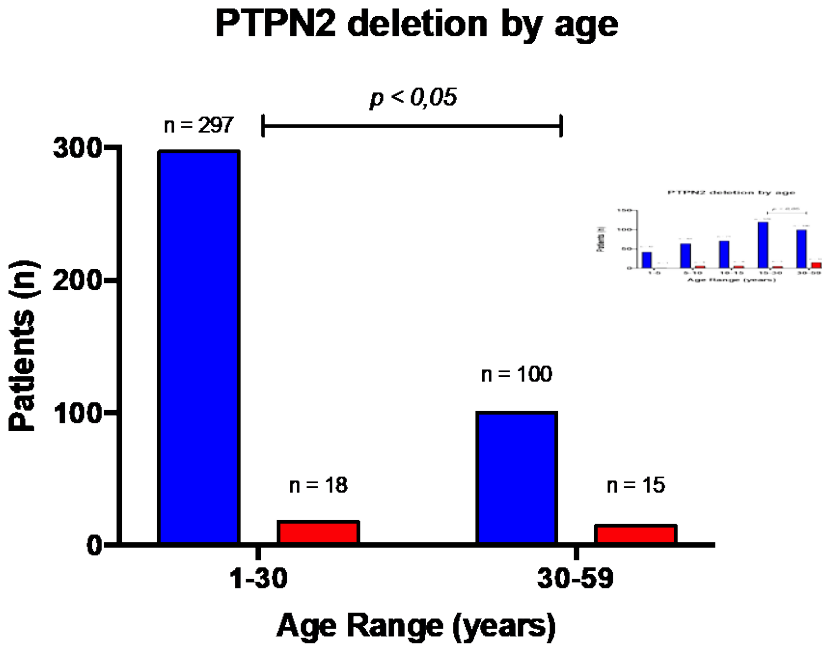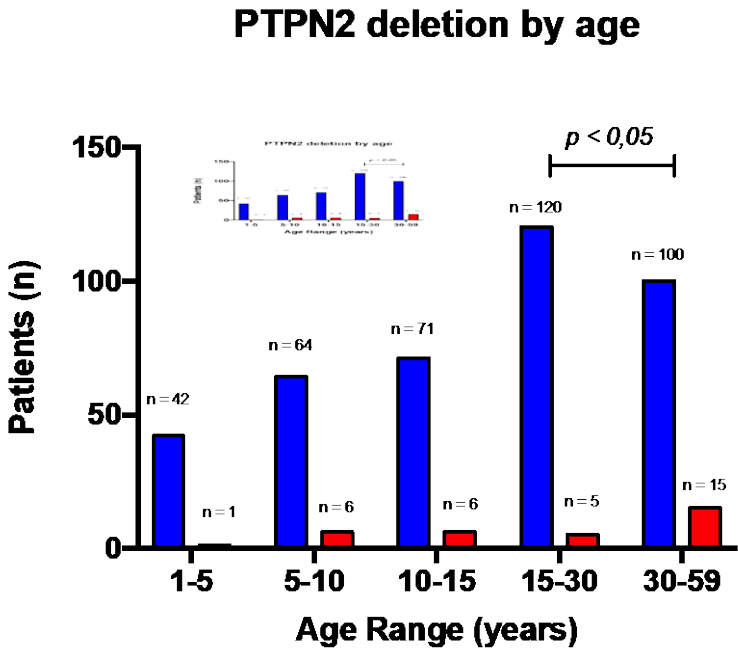

**Supplemental Figure 4.** PTPN2 deletions sorted by age

Schematic representation of PTPN2 deletions frequency according to age.

## SUPPLEMENTAL TABLES

**Supplemental Table 1. Chemotherapy in the standard risk group T1.**

| <b>Drug/Administration route</b>   | <b>mg/m2/day</b> | <b>Day</b>                                                  |
|------------------------------------|------------------|-------------------------------------------------------------|
| <b>Prephase</b>                    |                  |                                                             |
| Prednisone/po-iv                   | 60               | 1-7                                                         |
| MTX/it                             | By age*          | 1                                                           |
| <b>Induction</b>                   |                  |                                                             |
| Prednisone/po-iv                   | 40               | 8-28 then tapered                                           |
| Vincristine/iv                     | 1.5 (max: 2 mg)  | 8, 15, 22, 29                                               |
| Daunorubicin/iv                    | 40               | 8, 9, 10, 15                                                |
| L-Asparaginase/iv                  | 6,000 IU/m2      | 8, 10, 12, 15, 17, 19                                       |
| Cyclophosphamide/iv                | 1000             | 8                                                           |
| MTX-ARAC-PRED/i.t                  | By age**         | 8, 15                                                       |
| <b>Consolidation</b>               |                  |                                                             |
| Tioguanine/po                      | 60               | 1-22                                                        |
| Cyclophosphamide/iv                | 1000             | 1-15                                                        |
| Aracytine/sc                       | 30/12h           | 1-2, 8-9, 15-16                                             |
| Prednisone/po-iv                   | 40               | 29-35                                                       |
| Mercaptopurine/po                  | 50               | 29-49                                                       |
| Vincristine/iv                     | 1.5 (max: 2 mg)  | 29, 43                                                      |
| Methotrexate/iv                    | 5000             | 29, 42                                                      |
| Methotrexate/po                    | 25               | 36                                                          |
| Leucovorin rescue                  | 15/6h            | 36h after start HD-MTX                                      |
| MTX-ARAC-PRED/i.t                  | By age**         | 1, 15, 29, 43                                               |
| <b>Delayed intensification n°1</b> |                  |                                                             |
| Dexamethasone/po-iv                | 10               | 1-14 then tapered                                           |
| Vindesine/iv                       | 3 (max: 4 mg)    | 1, 8, 15                                                    |
| Adriamycine/iv                     | 25               | 1, 8, 15                                                    |
| L-Asparaginase/iv                  | 6,000 IU/m2      | 3, 5, 8, 10, 12, 15                                         |
| Tioguanine/po                      | 60               | 29-49                                                       |
| Etoposide                          | 150              | 29, 36, 43                                                  |
| Aracytine/sc                       | 30/12h           | 29-30, 36-37, 43-44                                         |
| MTX-ARAC-PRED/i.t                  | By age**         | 3, ( $\pm$ 15 <sup>§</sup> ), 30, ( $\pm$ 43 <sup>§</sup> ) |
| <b>Interphase</b>                  |                  |                                                             |
| Prednisone/po-iv                   | 40               | 1-7, 29-35                                                  |
| Mercaptopurine/po                  | 50               | 1-49                                                        |
| Vincristine/iv                     | 1.5 (max: 2 mg)  | 1, 15, 29, 43                                               |
| Methotrexate/iv                    | 5000             | 1, 15, 29; 43                                               |
| Methotrexate/po                    | 25               | 8, 22, 36                                                   |
| Leucovorin rescue                  | 15/6h            | 36h after start HD-MTX                                      |
| MTX-ARAC-PRED/i.t                  | By age**         | 1, 15, 29, 43 <sup>§§</sup>                                 |



|                                    |                                      |                                  |
|------------------------------------|--------------------------------------|----------------------------------|
| Cranial irradiation                | 18 or 24 Gy <sup>&amp;</sup>         | 40-45                            |
| <b>Delayed intensification n°2</b> |                                      |                                  |
| Prednisone/po-iv                   | 40                                   | 1-14 then tapered                |
| Vincristine/iv                     | 1.5 (max: 2 mg)                      | 1, 8, 15                         |
| Daunorubicin/iv                    | 40                                   | 1, 8, 15                         |
| L-Asparaginase/iv                  | 6,000 IU/m <sup>2</sup>              | 3, 5, 8, 10, 12, 15              |
| Tioguanine/po                      | 60                                   | 29-49                            |
| Cyclophosphamide/iv                | 1000                                 | 29                               |
| Aracytine/sc                       | 30/12h                               | 29-30, 36-37, 43-44              |
| MTX-ARAC-PRED/i.t                  | By age <sup>**</sup> , <sup>§§</sup> | 3, 30                            |
| <b>Maintenance (18 months)</b>     |                                      |                                  |
| Prednisone/po-iv                   | 40                                   | 1-7 every 4 weeks <sup>***</sup> |
| Mercaptopurine/po                  | 50                                   | daily                            |
| Methotrexate/po                    | 25                                   | weekly                           |
| Vincristine/iv                     | 1.5 (max: 2 mg)                      | Every 4 weeks <sup>***</sup>     |
| MTX-ARAC-PRED/i.t                  | By age <sup>**</sup> , <sup>§§</sup> | Every 3 months, 3 times          |

### **Supplemental Table 1. Chemotherapy in the standard risk group T1.**

Abbreviations: iv, intravenous; po, per os; i.t., intrathecal; sc: subcutaneous

\* Age-adjusted doses of intrathecal methotrexate:  $\geq 1$  and  $< 2$  years: 8 mg;  $\geq 2$  and  $< 3$  years: 10 mg;  $\geq 3$  and  $< 10$  years: 12 mg;  $\geq 10$  years: 15 mg

\*\* Age-adjusted doses of triple intrathecal MTX, ARA-C and methylprednisolone respectively:  $\geq 1$  and  $< 2$  years: 8, 15 and 20 mg;  $\geq 2$  and  $< 3$  years: 10, 20 and 20 mg;  $\geq 3$  years and  $< 10$  years: 12, 25 and 20 mg;  $\geq 10$  years: 15, 20 and 20 mg

\*\*\* 12 times, then stopped

§ in case of CNS involvement

& Preventive use: 18 Gy only for patients  $\geq 4$  years with WBC  $\geq 100$  G/L at diagnosis; Therapeutic use (CNS involvement at diagnosis): 18 Gy for patients  $< 4$  years, 24 Gy for patients  $\geq 4$  years

§§ Except for irradiated patients

**Supplemental Table 2. Chemotherapy in the high risk group T2.**

| <b>Drug/Administration route</b>   | <b>mg/m2/day</b> | <b>Day</b>             |
|------------------------------------|------------------|------------------------|
| <b>Prephase</b>                    |                  |                        |
| Prednisone/po-iv                   | 60               | 1-7                    |
| MTX/it                             | By age*          | 1                      |
| <b>Induction</b>                   |                  |                        |
| Prednisone/po-iv                   | 40               | 8–28 then tapered      |
| Vincristine/iv                     | 1.5 (max: 2 mg)  | 8, 15, 22, 29          |
| Daunorubicin/iv                    | 40               | 8, 9, 10, 15           |
| L-Asparaginase/iv                  | 6,000 IU/m2      | 8, 10, 12, 15, 17, 19  |
| Cyclophosphamide/iv                | 1000             | 8                      |
| MTX-ARAC-PRED/i.t                  | By age**         | 8, 15                  |
| <b>Consolidation</b>               |                  |                        |
| <b>VEDA n°1</b>                    |                  |                        |
| Dexamethasone/po-iv                | 20               | 1-5                    |
| Vincristine/iv                     | 1.5 (max: 2 mg)  | 1                      |
| Aracytine/iv                       | 2000/12h         | 1, 2                   |
| Etoposide/iv                       | 150              | 3, 4, 5                |
| MTX-ARAC-PRED/i.t                  | By age**         | 5                      |
| <b>COPADM</b>                      |                  |                        |
| Prednisone/po-iv                   | 40               | 1-5                    |
| Vincristine/iv                     | 1.5 (max: 2 mg)  | 1                      |
| Adriamycine/iv                     | 25               | 2                      |
| Methotrexate/iv                    | 5000             | 1                      |
| Leucovorin rescue                  | 15/6h            | 36h after start HD-MTX |
| Cyclophosphomide                   | 500/12h          | 2, 3                   |
| MTX-ARAC-PRED/i.t                  | By age**         | 2                      |
| <b>VEDA n°2</b>                    |                  |                        |
| identical to n°1                   |                  |                        |
| <b>Delayed intensification n°1</b> |                  |                        |
| Dexamethasone/po-iv                | 10               | 1-14 then tapered      |
| Vindesine/iv                       | 3 (max: 4 mg)    | 1, 8, 15               |
| Adriamycine/iv                     | 25               | 1, 8, 15               |
| L-Asparaginase/iv                  | 6,000 IU/m2      | 3, 5, 8, 10, 12, 15    |
| Tioguanine/po                      | 60               | 29-49                  |
| Etoposide                          | 150              | 29, 36, 43             |

|                                    |                 |                         |
|------------------------------------|-----------------|-------------------------|
| Aracytine/sc                       | 30/12h          | 29-30, 36-37, 43-44     |
| MTX-ARAC-PRED/i.t                  | By age**        | 3, 30, ( $\pm$ 43§)     |
| <b>Interphase</b>                  |                 |                         |
| Prednisone/po-iv                   | 40              | 1-7, 29-35              |
| Mercaptopurine/po                  | 50              | 1-49                    |
| Vincristine/iv                     | 1.5 (max: 2 mg) | 1, 15, 29 ( $\pm$ 43§)  |
| Methotrexate/iv                    | 5000            | 1, 15, 29 ( $\pm$ 43§)  |
| Methotrexate/po                    | 25              | 8, 22, 36               |
| Leucovorin rescue                  | 15/6h           | 36h after start HD-MTX  |
| MTX-ARAC-PRED/i.t                  | By age**        | 1, 15, 29 ( $\pm$ 43§)  |
| Cranial irradiation                | 18 to 24 Gy &   | 40-45                   |
| <b>Delayed intensification n°2</b> |                 |                         |
| Prednisone/po-iv                   | 40              | 1-14 then tapered       |
| Vincristine/iv                     | 1.5 (max: 2 mg) | 1, 8, 15                |
| Daunorubicin/iv                    | 40              | 1, 8, 15                |
| L-Asparaginase/iv                  | 6,000 IU/m2     | 3, 5, 8, 10, 12, 15     |
| Tioguanine/po                      | 60              | 29-49                   |
| Cyclophosphamide/iv                | 1000            | 29                      |
| Aracytine/sc                       | 30/12h          | 29-30, 36-37, 43-44     |
| MTX-ARAC-PRED/i.t                  | By age**, §§    | 3, 30                   |
| <b>Maintenance (18 months)</b>     |                 |                         |
| Prednisone/po-iv                   | 40              | 1-7 every 4 weeks ***   |
| Mercaptopurine/po                  | 50              | daily                   |
| Methotrexate/po                    | 25              | weekly                  |
| Vincristine/iv                     | 1.5 (max: 2 mg) | Every 4 weeks ***       |
| MTX-ARAC-PRED/i.t                  | By age**, §§    | Every 3 months, 3 times |

## **Supplemental Table 2. Chemotherapy in the high risk group T2.**

Abbreviations: iv, intravenous; po, per os; i.t., intrathecal; sc: subcutaneous

\* Age-adjusted doses of intrathecal methotrexate:  $\geq 1$  and  $< 2$  years: 8 mg;  $\geq 2$  and  $< 3$  years: 10 mg;  $\geq 3$  and  $< 10$  years: 12 mg;  $\geq 10$  years: 15 mg

\*\* Age-adjusted doses of triple intrathecal MTX, ARA-C and methylprednisolone respectively:  $\geq 1$  and  $< 2$  years: 8, 15 and 20 mg;  $\geq 2$  and  $< 3$  years: 10, 20 and 20 mg;  $\geq 3$

years and < 10 years: 12, 25 and 20 mg;  $\geq 10$  years: 15, 20 and 20 mg

\*\*\* 12 times, then stopped

§ in case of CNS involvement

& Preventive use: 18 Gy for patients  $\geq 4$  years; Therapeutic use (CNS involvement at diagnosis): 18 Gy for patients <4 years, 24 Gy for patients  $\geq 4$  years

§§ Except for irradiated patients

**Supplemental Table 3. Clinicobiologic characteristics of adult patients with T-ALL (GRAALL protocol) according to PTPN2 status.**

|                                                                      | <b>PTPN2 del</b> | <b>PTPN2 WT</b>  | <b>Total</b>      | <b>p-value</b> |
|----------------------------------------------------------------------|------------------|------------------|-------------------|----------------|
|                                                                      | <b>20 (9%)*</b>  | <b>196 (91%)</b> | <b>216 (100%)</b> |                |
| <b><i>Clinical Subsets Analyzed</i></b>                              |                  |                  |                   |                |
| Male                                                                 | 14/20 (70%)      | 140/196 (71%)    | 154/216 (71%)     | 1              |
| Median Age, Years                                                    | 36.9             | 30.4             | 30.8              | <b>0.02</b>    |
| (Range)                                                              | (23.4 – 57.0)    | (16.3 – 59.1)    | (16.3 – 59.1)     |                |
| WBC, Median                                                          | 24.6             | 32.6             | 31.7              | 0.2            |
| (Range)                                                              | (4.1 – 233)      | (0.9 – 645)      | (0.9 – 645)       |                |
| CNS involvement                                                      | 1/20 (5%)        | 25/193 (13%)     | 26/213 (12%)      | 0.26           |
| <b><i>T-cell receptor status</i></b>                                 |                  |                  |                   |                |
| Immature (IM0, IMD, IMG)                                             | 2/18 (11%)       | 53/170 (31%)     | 55/188 (29%)      | 0.06           |
| $\alpha\beta$ lineage (IMB, pré- $\alpha\beta$ , TCR $\alpha\beta$ ) | 15/18 (83%)      | 99/170 (58%)     | 114/188 (61%)     | <b>0.03</b>    |
| $\gamma\delta$ lineage (TCR $\gamma\delta$ )                         | 1/18 (6%)        | 18/170 (11%)     | 19/188 (10%)      | 0.43           |
| <b><i>Oncogenetics</i></b>                                           |                  |                  |                   |                |
| TLX1                                                                 | 10/19 (53%)      | 33/185 (18%)     | 43/204 (21%)      | <b>0.001</b>   |
| TLX3                                                                 | 4/19 (21%)       | 22/185 (12%)     | 26/204 (13%)      | 0.21           |
| SIL-TAL1                                                             | 1/19 (5%)        | 19/185 (10%)     | 20/204 (10%)      | 0.7            |
| NUP214-ABL                                                           | 4/20 (20%)       | 10/195 (5%)      | 14/215 (6%)       | <b>0.03</b>    |
| PTEN deleted/mutated                                                 | 0/20             | 25/195 (13%)     | 25/215 (12%)      | 0.14           |
| NOTCH1/FBXW7 mutated                                                 | 16/20 (80%)      | 132/196 (67%)    | 148/216 (68%)     | 0.3            |
| <b><i>Treatment response</i></b>                                     |                  |                  |                   |                |
| Corticosenitivity                                                    | 15/20 (75%)      | 105/196 (54%)    | 120/216 (56%)     | 0.1            |
| CR                                                                   | 19/20 (95%)      | 180/196 (92%)    | 199/216 (92%)     | 1              |
| MRD1 $\geq 10^{-4**}$                                                | 2/15 (13%)       | 35/109 (32%)     | 37/124 (30%)      | 0.2            |

**Supplemental Table 3. Clinicobiologic characteristics of adult patients with T-ALL (GRAALL protocol) according to PTPN2 status.**

Comparison of the clinicobiologic characteristics of PTPN2 deleted and wild-type T-ALL patients in the adult cohort. Abbreviations: T-ALL, T-cell acute lymphoblastic leukemia; del, deleted; WT, wild-type; WBC, white blood count; CNS, central nervous system; CR, complete remission; MRD, minimal residual disease.

T-cell receptor status and oncogenetics were determined as previously described.<sup>2-4</sup>

\* monoallelic 10/20, biallelic 10/20

\*\* MRD was centrally assessed by real-time quantitative allele-specific oligonucleotide polymerase chain reaction and interpreted according to EuroMRD group guidelines.<sup>5,6</sup>

**Supplemental Table 4. Clinical characteristics and outcome of the study cohort versus non-investigated patients (GRALL protocol)**

| GRAALL 03-05                            | Study Cohort<br>(N = 216) | Non-<br>investigated<br>Cohort<br>(N = 121) | p-value |
|-----------------------------------------|---------------------------|---------------------------------------------|---------|
| <b><i>Clinical Subsets Analyzed</i></b> |                           |                                             |         |
| Male                                    | 154                       | 85                                          | 0.9     |
| Median Age, Years                       | 30.8                      | 33.5                                        | 0.16    |
| (Range)                                 | (16.3-59.1)               | (17.6-59.5)                                 |         |
| WBC, Median                             | 31.7                      | 18                                          | 0.001   |
| (Range)                                 | (0.9-645.0)               | (0.9-573.0)                                 |         |
| CNS involvement                         | 26/216 (12%)              | 9/121 (7%)                                  | 0.2     |
| Allo-SCT                                | 76/216 (35%)              | 33/121 (27%)                                | 0.14    |
| <b><i>Treatment Response</i></b>        |                           |                                             |         |
| Corticosenitivity                       | 120/216 (56%)             | 85/121 (70%)                                | 0.01    |
| CR                                      | 199/216 (92%)             | 115/121 (96%)                               | 0.25    |
| 5y-CIR, % (95%CI)                       | 30% (24-37)               | 33% (25-43)                                 | 0.45    |
| 5y-OS, % (95%CI)                        | 66% (59-72)               | 61% (51-69)                                 | 0.36    |

**Supplemental Table 4. Clinical characteristics and outcome of the study cohort versus non-investigated patients (GRALL protocol)**

Comparison of the clinicobiologic characteristics of the patients in the study cohort versus the non-investigated patients included in the GRAALL protocol.

Abbreviations: WBC, white blood cell count; CNS, central nervous system; CR, complete remission; CIR, cumulative incidence of relapse; OS, overall survival; CI, confidence interval; SCT, stem cell transplantation.

**Supplemental Table 5. Clinicobiologic characteristics of pediatric patients with T-ALL (FRALLE protocol) according to PTPN2 status.**

|                                                                      | <b>PTPN2 del</b> | <b>PTPN2 WT</b>  | <b>Total</b>      | <b>p-value</b> |
|----------------------------------------------------------------------|------------------|------------------|-------------------|----------------|
|                                                                      | <b>13 (6%)*</b>  | <b>201 (94%)</b> | <b>214 (100%)</b> |                |
| <b><i>Clinical Subsets Analyzed</i></b>                              |                  |                  |                   |                |
| Male                                                                 | 8/13 (61%)       | 166/201 (83%)    | 174/214 (81%)     | 0.07           |
| Median Age, Years                                                    | 9.0              | 9.48             | 9.48              | ns             |
| (Range)                                                              | (4.3 – 14.3)     | (1.1 – 19.5)     | (1.1 – 19.5)      |                |
| WBC, Median                                                          | 99               | 96.9             | 97.9              | ns             |
| (Range)                                                              | (7.6 – 574)      | (0.3 – 980)      | (0.3 – 980)       |                |
| CNS involvement                                                      | 4/13 (31%)       | 12/201 (6%)      | 16/214 (7%)       | <b>0.01</b>    |
| <b><i>T-cell receptor status</i></b>                                 |                  |                  |                   |                |
| Immature (IM0, IMD, IMG)                                             | 0/8              | 11/107 (10%)     | 11/115 (10%)      | 1              |
| $\alpha\beta$ lineage (IMB, pré- $\alpha\beta$ , TCR $\alpha\beta$ ) | 8/8 (100%)       | 75/107 (70%)     | 83/115 (72%)      | 0.1            |
| $\gamma\delta$ lineage (TCR $\gamma\delta$ )                         | 0/8              | 21/107 (20%)     | 21/115 (18%)      | 0.3            |
| <b><i>Oncogenetics</i></b>                                           |                  |                  |                   |                |
| TLX1                                                                 | 3/8 (37%)        | 6/123 (5%)       | 9/131 (7%)        | <b>0.01</b>    |
| TLX3                                                                 | 5/8 (63%)        | 30/123 (24%)     | 35/131 (27%)      | <b>0.03</b>    |
| SIL-TAL1                                                             | 0/8              | 18/123 (15%)     | 18/131 (14%)      | 0.6            |
| NUP214-ABL                                                           | 1/4 (25%)        | 7/62 (11%)       | 8/66 (12%)        | 0.4            |
| PTEN deleted/mutated                                                 | 0/13             | 30/201 (15%)     | 30/214 (14%)      | 0.22           |
| NOTCH1/FBXW7 mutated                                                 | 12/13 (92%)      | 118/201 (59%)    | 130/214 (61%)     | <b>0.02</b>    |
| <b><i>Treatment response</i></b>                                     |                  |                  |                   |                |
| Corticosenitivity                                                    | 10/12 (83%)      | 112/192 (58%)    | 122/204 (60%)     | 0.1            |
| CR                                                                   | 13/13 (100%)     | 194/201 (97%)    | 207/214 (97%)     | 1              |
| MRD1 $\geq 10^{-4}$ **                                               | 3/13 (23%)       | 74/176 (42%)     | 77/189 (41%)      | 0.2            |



**Supplemental Table 5. Clinicobiologic characteristics of pediatric patients with T-ALL (FRALLE protocol) according to PTPN2 status.**

Comparison of the clinicobiologic characteristics of PTPN2 deleted and wild-type T-ALL patients in the pediatric cohort. Abbreviations: T-ALL, T-cell acute lymphoblastic leukemia; del, deleted; WT, wild-type; WBC, white blood count; CNS, central nervous system; CR, complete remission; MRD, minimal residual disease.

T-cell receptor status and oncogenetics were determined as previously described.<sup>2-4</sup>

\* monoallelic 6/13, biallelic 7/13

\*\* MRD was centrally assessed by real-time quantitative allele-specific oligonucleotide polymerase chain reaction and interpreted according to EuroMRD group guidelines.<sup>5,6</sup>

**Supplemental Table 6. Clinical characteristics and outcome of the study cohort versus non-investigated patients (FRALLE protocol)**

| FRALLE 2000T                            | Study Cohort<br>(N = 214) | Non-<br>investigated<br>Cohort<br>(N = 191) | p-value |
|-----------------------------------------|---------------------------|---------------------------------------------|---------|
| <b><i>Clinical Subsets Analyzed</i></b> |                           |                                             |         |
| Male                                    | NA                        | NA                                          |         |
| Median Age, Years                       | 9.5                       | 8.9                                         | 0.16    |
| (Range)                                 | (1.1-19.5)                | (1.3-18.7)                                  |         |
| WBC, Median                             | 101                       | 72                                          | 0.7     |
| (Range)                                 | (0.3-980.0)               | (0.9-900.0)                                 |         |
| CNS involvement                         | 16/214 (8%)               | 25/191 (17%)                                | 0.048   |
| Allo-SCT                                | 28/214 (13%)              | 30/191 (15%)                                | 0.47    |
| <b><i>Treatment Response</i></b>        |                           |                                             |         |
| Corticosenstivity                       | 122/204 (60%)             | 100/186 (54%)                               | 0.26    |
| CR                                      | 207/214 (97%)             | 168/191 (88%)                               | 0.001   |
| 5y-CIR, % (95%CI)                       | 25% (19-32)               | 25% (18-32)                                 | 0.72    |
| 5y-OS, % (95%CI)                        | 79% (73-84)               | 74% (66-80)                                 | 0.18    |

**Supplemental Table 6. Clinical characteristics and outcome of the study cohort versus non-investigated patients (FRALLE protocol)**

Comparison of the clinicobiologic characteristics of the patients in the study cohort versus the non-investigated patients included in the FRALLE protocol.

Abbreviations: WBC, white blood cell count; CNS, central nervous system; CR, complete remission; CIR, cumulative incidence of relapse; OS, overall survival; CI, confidence interval; SCT, stem cell transplantation; NA, not available.

**Supplemental Table 7. Genetic profile of PTPN2 deleted adult T-ALL.**

|                                | PTPN2 del<br>N = 19 | PTPN2 WT<br>N = 175 | Total<br>N = 194    | p-value           |
|--------------------------------|---------------------|---------------------|---------------------|-------------------|
| <b>JAK-STAT signaling</b>      |                     |                     |                     |                   |
| <b>DNM2</b>                    | <b>9/19 (47%)</b>   | <b>29/175 (17%)</b> | <b>38/194 (20%)</b> | <b>0,004</b>      |
| JAK3                           | 5/19 (26%)          | 31/175 (18%)        | 36/194 (19%)        | 0,36              |
| IL7R                           | 4/19 (21%)          | 19/175 (11%)        | 23/194 (12%)        | 0,25              |
| JAK1                           | 1/19 (5%)           | 15/175 (9%)         | 16/194 (8%)         | 1                 |
| SH2B3                          | 2/19 (11%)          | 11/175 (6%)         | 13/194 (7%)         | 0,37              |
| STAT5B                         | 1/19 (5%)           | 9/175 (5%)          | 10/194 (5%)         | 1                 |
| <b>PI3K-AKT-mTOR signaling</b> |                     |                     |                     |                   |
| PTEN                           | 0/19 (0%)           | 23/175 (13%)        | 23/194 (12%)        | 0,14              |
| PIK3R1                         | 1/19 (5%)           | 5/175 (3%)          | 6/194 (3%)          | 0,47              |
| PIK3CA                         | 1/19 (5%)           | 3/175 (2%)          | 4/194 (2%)          | 0,34              |
| AKT1                           | 0/19 (0%)           | 2/175 (1%)          | 2/194 (1%)          | 1                 |
| <b>RAS signaling</b>           |                     |                     |                     |                   |
| NRAS                           | 2/19 (11%)          | 17/175 (10%)        | 19/194 (10%)        | 1                 |
| KRAS                           | 1/19 (5%)           | 6/175 (3%)          | 7/194 (4%)          | 0,52              |
| NF1                            | 1/19 (5%)           | 4/175 (2%)          | 5/194 (3%)          | 0,41              |
| BRAF                           | 0/19 (0%)           | 3/175 (2%)          | 3/194 (2%)          | 1                 |
| PTPN11                         | 0/19 (0%)           | 1/175 (1%)          | 1/194 (1%)          | 1                 |
| <b>Epigenomic</b>              |                     |                     |                     |                   |
| <b>PHF6</b>                    | <b>18/19 (95%)</b>  | <b>71/175 (41%)</b> | <b>89/194 (46%)</b> | <b>&lt;0,0001</b> |
| DNMT3A                         | 0/19 (0%)           | 20/175 (11%)        | 20/194 (10%)        | 0,23              |
| SUZ12                          | 2/19 (11%)          | 16/175 (9%)         | 18/194 (9%)         | 0,69              |
| CTCF                           | 2/19 (11%)          | 11/175 (6%)         | 13/194 (7%)         | 0,37              |
| KMT2D                          | 1/19 (5%)           | 12/175 (7%)         | 13/194 (7%)         | 1                 |
| EP300                          | 1/19 (5%)           | 11/175 (6%)         | 12/194 (6%)         | 1                 |
| KMT2A                          | 1/19 (5%)           | 9/175 (5%)          | 10/194 (5%)         | 1                 |
| SETD2                          | 1/19 (5%)           | 8/175 (5%)          | 9/194 (5%)          | 1                 |
| ASXL1                          | 2/19 (11%)          | 8/175 (5%)          | 10/194 (5%)         | 0,25              |
| EZH2                           | 1/19 (5%)           | 6/175 (3%)          | 7/194 (4%)          | 0,52              |
| TET2                           | 0/19 (0%)           | 5/175 (3%)          | 5/194 (3%)          | 1                 |
| TET3                           | 0/19 (0%)           | 5/175 (3%)          | 5/194 (3%)          | 1                 |
| IDH2                           | 0/19 (0%)           | 5/175 (3%)          | 5/194 (3%)          | 1                 |
| EED                            | 0/19 (0%)           | 4/175 (2%)          | 4/194 (2%)          | 1                 |
| IDH1                           | 0/19 (0%)           | 3/175 (2%)          | 3/194 (2%)          | 1                 |
| HIST1H1B                       | 0/19 (0%)           | 1/175 (1%)          | 1/194 (1%)          | 1                 |
| <b>Notch signaling</b>         |                     |                     |                     |                   |
| NOTCH1                         | 17/19 (89%)         | 130/175 (74%)       | 147/194 (76%)       | 0,17              |
| FBXW7                          | 5/19 (26%)          | 32/175 (18%)        | 37/194 (19%)        | 0,37              |
| <b>Cell cycle/Apoptosis</b>    |                     |                     |                     |                   |
| CDKN2A                         | 0/19 (0%)           | 13/175 (7%)         | 13/194 (7%)         | 0,62              |

|                                   |                   |                     |                     |              |
|-----------------------------------|-------------------|---------------------|---------------------|--------------|
| TP53                              | 1/19 (5%)         | 3/175 (2%)          | 4/194 (2%)          | 0,34         |
| FAS                               | 0/19 (0%)         | 1/175 (1%)          | 1/194 (1%)          | 1            |
| RB1                               | 0/19 (0%)         | 1/175 (1%)          | 1/194 (1%)          | 1            |
| <b>Transcriptional regulation</b> |                   |                     |                     |              |
| BCL11B                            | 6/19 (32%)        | 26/175 (15%)        | 32/194 (16%)        | 0,1          |
| <b>WT1</b>                        | <b>5/19 (26%)</b> | <b>17/175 (10%)</b> | <b>22/194 (11%)</b> | <b>0,047</b> |
| RUNX1                             | 3/19 (16%)        | 13/175 (7%)         | 16/194 (8%)         | 0,2          |
| LEF1                              | 0/19 (0%)         | 5/175 (3%)          | 5/194 (3%)          | 1            |
| ETV6                              | 0/19 (0%)         | 6/175 (3%)          | 6/194 (3%)          | 1            |
| CNOT3                             | 0/19 (0%)         | 5/175 (3%)          | 5/194 (3%)          | 1            |
| TAL1                              | 0/19 (0%)         | 4/175 (2%)          | 4/194 (2%)          | 1            |
| IKZF1                             | 0/19 (0%)         | 3/175 (2%)          | 3/194 (2%)          | 1            |
| ZEB1                              | 1/19 (5%)         | 3/175 (2%)          | 4/194 (2%)          | 0,34         |
| GATA3                             | 0/19 (0%)         | 1/175 (1%)          | 1/194 (1%)          | 1            |
| TBL1XR1                           | 0/19 (0%)         | 1/175 (1%)          | 1/194 (1%)          | 1            |
| CEBPA                             | 0/19 (0%)         | 2/175 (1%)          | 2/194 (1%)          | 1            |
| CUX1                              | 0/19 (0%)         | 2/175 (1%)          | 2/194 (1%)          | 1            |
| <b>Ribosome</b>                   |                   |                     |                     |              |
| RPL5                              | 2/19 (11%)        | 5/175 (3%)          | 7/194 (4%)          | 0,14         |
| RPL10                             | 0/19 (0%)         | 3/175 (2%)          | 3/194 (2%)          | 1            |
| <b>RNA processing</b>             |                   |                     |                     |              |
| ZRSR2                             | 0/19 (0%)         | 10/175 (6%)         | 10/194 (5%)         | 0,6          |
| SF3B1                             | 0/19 (0%)         | 3/175 (2%)          | 3/194 (2%)          | 1            |
| U2AF1                             | 0/19 (0%)         | 2/175 (1%)          | 2/194 (1%)          | 1            |
| <b>Signaling other</b>            |                   |                     |                     |              |
| ATM                               | 0/19 (0%)         | 7/175 (4%)          | 7/194 (4%)          | 1            |
| PTPRC                             | 0/19 (0%)         | 6/175 (3%)          | 6/194 (3%)          | 1            |
| RELN                              | 0/19 (0%)         | 6/175 (3%)          | 6/194 (3%)          | 1            |
| IRF4                              | 0/19 (0%)         | 3/175 (2%)          | 3/194 (2%)          | 1            |
| CARD11                            | 0/19 (0%)         | 2/175 (1%)          | 2/194 (1%)          | 1            |
| KIT                               | 0/19 (0%)         | 1/175 (1%)          | 1/194 (1%)          | 1            |
| FLT3                              | 0/19 (0%)         | 1/175 (1%)          | 1/194 (1%)          | 1            |
| <b>Chemokines</b>                 |                   |                     |                     |              |
| CXXC4                             | 0/19 (0%)         | 4/175 (2%)          | 4/194 (2%)          | 1            |
| CXCR4                             | 0/19 (0%)         | 3/175 (2%)          | 3/194 (2%)          | 1            |
| CCR4                              | 0/19 (0%)         | 1/175 (1%)          | 1/194 (1%)          | 1            |
| <b>Ubiquitination</b>             |                   |                     |                     |              |
| HACE1                             | 0/19 (0%)         | 1/175 (1%)          | 1/194 (1%)          | 1            |
| CUL3                              | 0/19 (0%)         | 1/175 (1%)          | 1/194 (1%)          | 1            |
| <b>Other</b>                      |                   |                     |                     |              |
| SAMHD1                            | 1/19 (5%)         | 1/175 (1%)          | 2/194 (1%)          | 0,19         |
| CD58                              | 0/19 (0%)         | 1/175 (1%)          | 1/194 (1%)          | 1            |
| ECT2L                             | 0/19 (0%)         | 1/175 (1%)          | 1/194 (1%)          | 1            |

**Supplemental Table 7. Genetic profile of PTPN2 deleted adult T-ALL.**

Comparison of the mutational genotypes of adult PTPN2 deleted (N = 19) and wild-type T-ALLs (N = 175). Percentage frequencies in each group and p-values are indicated. Genes are grouped by functional categories.

Abbreviations: T-ALL, T-cell acute lymphoblastic leukemia; del, deleted; WT, wild-type.

**Supplemental Table 8. Significant co-occurring mutations.**

|                                      | <b>PTPN2 del</b> | <b>PTPN2 WT</b>  | <b>Total</b>      | <b>p-value</b> |
|--------------------------------------|------------------|------------------|-------------------|----------------|
|                                      | <b>19 (10%)</b>  | <b>175 (90%)</b> | <b>194 (100%)</b> |                |
| <b><i>Mutated gene / pathway</i></b> |                  |                  |                   |                |
| IL7R/JAK-STAT*                       | 14/19 (74%)      | 72/175 (41%)     | 86/194 (44%)      | 0.008          |
| PHF6                                 | 18/19 (95%)      | 71/175 (41%)     | 89/194 (46%)      | < 0.0001       |
| WT1                                  | 5/19 (26%)       | 17/175 (10%)     | 22/194 (11%)      | 0.047          |

**Supplemental Table 8. Significant co-occurring mutations.**

Significant mutations co-occurring with PTPN2 deletions in adult T-ALL patients are highlighted. Percentage frequencies in each group and p-values are indicated.

Abbreviations: T-ALL, T-cell acute lymphoblastic leukemia; del, deleted; WT, wild-type

\* IL7R, JAK1, JAK3, STAT5B, DNMT2, SH2B3

**Supplemental Table 9.** Focus on IL7R/JAK/STAT pathway mutations in PTPN2 deleted patients

| <b>JAK-STAT signaling mutations in PTPN2 deleted patients</b> |                              |                            |                   |                       |                 |
|---------------------------------------------------------------|------------------------------|----------------------------|-------------------|-----------------------|-----------------|
|                                                               | <b>Coding<br/>(missense)</b> | <b>Stop<br/>(nonsense)</b> | <b>Frameshift</b> | <b>Non Frameshift</b> | <b>Splicing</b> |
| DNM2 (n=9)                                                    | <b>2</b>                     | <b>2</b>                   | <b>3</b>          | <b>1</b>              | <b>1</b>        |
| JAK3 (n=5)                                                    | <b>5</b>                     |                            |                   |                       |                 |
| IL7R (n=4)                                                    |                              |                            | <b>1</b>          | <b>3</b>              |                 |
| JAK1 (n=1)                                                    | <b>1</b>                     |                            |                   |                       |                 |
| SH2B3 (n=2)                                                   | <b>1</b>                     | <b>1</b>                   |                   |                       |                 |
| STAT5B (n=1)                                                  | <b>1</b>                     |                            |                   |                       |                 |

**Supplemental Table 9.** Focus on IL7R/JAK/STAT pathway mutations in PTPN2 deleted patients

## SUPPLEMENTAL REFERENCES

1. Livak KJ, Schmittgen TD. Analysis of relative gene expression data using real-time quantitative PCR and the 2(-Delta Delta C(T)) Method. *Methods San Diego Calif* 2001;25(4):402–408.
2. Asnafi V, Beldjord K, Boulanger E, et al. Analysis of TCR, pT alpha, and RAG-1 in T-acute lymphoblastic leukemias improves understanding of early human T-lymphoid lineage commitment. *Blood* 2003;101(7):2693–2703.
3. Bergeron J, Clappier E, Radford I, et al. Prognostic and oncogenic relevance of TLX1/HOX11 expression level in T-ALLs. *Blood* 2007;110(7):2324–2330.
4. Trinquand A, Tanguy-Schmidt A, Ben Abdelali R, et al. Toward a NOTCH1/FBXW7/RAS/PTEN-based oncogenetic risk classification of adult T-cell acute lymphoblastic leukemia: a Group for Research in Adult Acute Lymphoblastic Leukemia study. *J Clin Oncol Off J Am Soc Clin Oncol* 2013;31(34):4333–4342.
5. Pongers-Willems MJ, Verhagen OJ, Tibbe GJ, et al. Real-time quantitative PCR for the detection of minimal residual disease in acute lymphoblastic leukemia using junctional region specific TaqMan probes. *Leukemia* 1998;12(12):2006–2014.
6. van der Velden VHJ, Cazzaniga G, Schrauder A, et al. Analysis of minimal residual disease by Ig/TCR gene rearrangements: guidelines for interpretation of real-time quantitative PCR data. *Leukemia* 2007;21(4):604–611.
